# Supplementary material for: GAL08, an Uncultivated Group of Acidobacteria, Is a Dominant Bacterial Clade in a Neutral Hot Spring
Source: PubMed Central journal article supplement (PMC8787282; doi:10.3389/fmicb.2021.787651), 2022-01-11
Supplement: Data_Sheet_1.pdf [file Data_Sheet_1.pdf]

### Supplementary Table S1

A list of sequences included in the construction of the 16S rRNA gene sequence tree presented in Figure 5. The ARB-Siva.de release 132 accession number, full name, and isolation source, where available, is provided for each sequence used. We used all 12 database entries classified as GAL08 in release 132 of the Silva rRNA gene database (listed in the table below). Additionally, six full-length 16S rRNA gene sequences (obtained from SAG and MAG data) of three GAL08 species from the Dewar Creek hot spring were imported into the database and used in construction of this tree. The outgroup was created by selecting 1 sequence from each of the other 29 phyla with cultivated representatives.

| Accession Number | Full Name                                                        | Source                                    |
|------------------|------------------------------------------------------------------|-------------------------------------------|
| AUAL01000024     | <i>Acholeplasma axanthum</i> ATCC 25176                          | N/A                                       |
| LLEU01000014     | <i>Acidobacteria bacterium</i> OLB17                             | partial-nitritation anammox (PNA) reactor |
| CP001472         | <i>Acidobacterium capsulatum</i> ATCC 51196                      | N/A                                       |
| AB545935         | <i>Actinomyces oris</i>                                          | N/A                                       |
| AP012029         | <i>Anaerolinea thermophila</i> UNI-1                             | N/A                                       |
| KF245633         | <i>Aridibacter kavangonensis</i>                                 | soil                                      |
| EU136683         | <i>Bacteroides pyogenes</i>                                      | N/A                                       |
| JQ309130         | <i>Blastocatella fastidiosa</i>                                  | soil                                      |
| AANZ01000021     | <i>Blastopirellula marina</i> DSM 3645                           | N/A                                       |
| AM162405         | <i>Bryobacter aggregatus</i>                                     | <i>Sphagnum</i> peat bog                  |
| FR666706         | <i>Bryocella elongata</i>                                        | <i>Sphagnum</i> peat bog                  |
| AP012051         | <i>Caldisericum exile</i> AZM16c01                               | N/A                                       |
| CP000051         | <i>Chlamydia trachomatis</i> A/HAR-13                            | N/A                                       |
| CP002514         | <i>Chloracidobacterium thermophilum</i> B                        | thermal spring                            |
| CP001100         | <i>Chloroherpeton thalassium</i> ATCC 35110                      | N/A                                       |
| X81319           | <i>Chrysiogenes arsenatis</i> DSM 11915                          | N/A                                       |
| AM749780         | <i>Chthonomonas calidirosea</i>                                  | steam-affected geothermal soil            |
| AP011529         | <i>Deferribacter desulfuricans</i> SSM1                          | N/A                                       |
| AJ585986         | <i>Deinococcus marmoris</i>                                      | N/A                                       |
| ABTR02000001     | <i>Dethiosulfovibrio peptidovorans</i> DSM 11002                 | corroding offshore oil well               |
| CP001146         | <i>Dictyoglomus thermophilum</i> H-6-12                          | N/A                                       |
| DQ528761         | <i>Edaphobacter aggregans</i>                                    | temperate soil                            |
| AM490846         | <i>Elusimicrobium minutum</i>                                    | N/A                                       |
| CU928158         | <i>Escherichia fergusonii</i> ATCC 35469                         | N/A                                       |
| CP001792         | <i>Fibrobacter succinogenes</i> subsp. <i>succinogenes</i> S85   | N/A                                       |
| AFQD01000460     | <i>Fusobacterium nucleatum</i> subsp. <i>animalis</i> ATCC 51191 | urogenital tract, vaginal                 |
| AP009153         | <i>Gemmatimonas aurantiaca</i> T-27                              | activated sludge for phosphorus removal   |
| AUAU01000033     | <i>Geothrix fermentans</i> DSM 14018                             | N/A                                       |
| AB372855         | <i>Haloferula helveola</i>                                       | N/A                                       |

|          |                                         |                                                                   |
|----------|-----------------------------------------|-------------------------------------------------------------------|
| X77215   | <i>Holophaga foetida</i>                | N/A                                                               |
| AB026268 | <i>Hydrogenobacter subterraneus</i>     | N/A                                                               |
| X82558   | <i>Nitrospira moscoviensis</i>          | N/A                                                               |
| AM749787 | <i>Pyrinomonas methylaliphatogenes</i>  | steam-affected geothermal soil                                    |
| AF357916 | <i>Sphaerochaeta globosa str. Buddy</i> | N/A                                                               |
| AB076610 | <i>Sporotomaculum syntrophicum</i>      | N/A                                                               |
| KP638491 | <i>Stenotrophobacter namibiensis</i>    | soil                                                              |
| KP638489 | <i>Stenotrophobacter roseus</i>         | soil                                                              |
| KF840371 | <i>Stenotrophobacter terrae</i>         | soil                                                              |
| KP334257 | <i>Tellurimicrobium multivorans</i>     | soil                                                              |
| HM214537 | <i>Terriglobus saanensis</i> SP1PR4     | N/A                                                               |
| JF346116 | <i>Thermosulfurimonas dismutans</i>     | deep-sea sulfidic structure at<br>Mariner hydrothermal vent field |
| CP000916 | <i>Thermotoga neapolitana</i> DSM 4359  | N/A                                                               |
| GQ984352 | uncultured bacterium                    | Northern Bering Sea surface<br>water                              |
| AB128876 | uncultured bacterium                    | deep marine sediments                                             |
| AB238786 | uncultured bacterium                    | N/A                                                               |
| AB240262 | uncultured bacterium                    | N/A                                                               |
| AB672246 | uncultured bacterium                    | rice paddy field soil                                             |
| AB754130 | uncultured bacterium                    | lake water                                                        |
| AB803523 | uncultured bacterium                    | ocean drilling core sample                                        |
| AB821092 | uncultured bacterium                    | soil of Gotjawal Forest                                           |
| AP011670 | uncultured bacterium                    | N/A                                                               |
| DQ394896 | uncultured bacterium                    | harbor sediment                                                   |
| DQ395349 | uncultured bacterium                    | deep-sea octacoral                                                |
| DQ490001 | uncultured bacterium                    | sediment from hot spring                                          |
| DQ645247 | uncultured bacterium                    | circumneutral hot springs                                         |
| EF492957 | uncultured bacterium                    | soil around iron-manganese<br>nodule                              |
| EF492968 | uncultured bacterium                    | soil around iron-manganese<br>nodule                              |
| EF580960 | uncultured bacterium                    | freshwater calcareous mat                                         |
| EU043668 | uncultured bacterium                    | Altamaha and Ohopee River<br>Valley                               |
| EU245824 | uncultured bacterium                    | hypersaline microbial mat                                         |
| EU328008 | uncultured bacterium                    | moderate saline soil                                              |
| EU335198 | uncultured bacterium                    | saturated C horizon soil<br>aggregate                             |
| EU487939 | uncultured bacterium                    | sediment from <i>Thalassia</i> sea<br>grass bed                   |
| EU669607 | uncultured bacterium                    | soil                                                              |
| EU881247 | uncultured bacterium                    | serious disturbance field soil                                    |
| FJ269282 | uncultured bacterium                    | sponge tissue                                                     |

|          |                      |                                           |
|----------|----------------------|-------------------------------------------|
| FJ478609 | uncultured bacterium | undisturbed tall grass prairie            |
| FJ478644 | uncultured bacterium | undisturbed tall grass prairie            |
| FJ478679 | uncultured bacterium | undisturbed tall grass prairie            |
| FJ479073 | uncultured bacterium | undisturbed tall grass prairie            |
| FJ479110 | uncultured bacterium | undisturbed tall grass prairie            |
| FJ538138 | uncultured bacterium | paddy field soil                          |
| FJ545586 | uncultured bacterium | North Yellow Sea sediment                 |
| FJ624910 | uncultured bacterium | boreal pine forest soil                   |
| FJ624929 | uncultured bacterium | boreal pine forest soil                   |
| FJ748818 | uncultured bacterium | Pearl River Estuary sediments             |
| FJ821661 | uncultured bacterium | hot spring sediment                       |
| FN870304 | uncultured bacterium | acidic coal mine lake                     |
| GQ487992 | uncultured bacterium | soil polluted by heavy metals             |
| GQ500694 | uncultured bacterium | sandy clastic sediments                   |
| GQ500851 | uncultured bacterium | bio-sep beads                             |
| GU180169 | uncultured bacterium | sediment and soil slurry                  |
| HF912752 | uncultured bacterium | microbial community of a marine sponge    |
| HM185851 | uncultured bacterium | subsurface of the Hanford Site            |
| HM187292 | uncultured bacterium | subsurface of the Hanford Site            |
| HM243842 | uncultured bacterium | Honghu Lake sediment                      |
| HM243859 | uncultured bacterium | Honghu Lake sediment                      |
| HM445340 | uncultured bacterium | mat from lava tube walls                  |
| HM445421 | uncultured bacterium | mat from lava tube walls                  |
| HM448259 | uncultured bacterium | Bison Pool                                |
| HM641001 | uncultured bacterium | Ulu Slim hot spring                       |
| HQ121145 | uncultured bacterium | loamy sand from a field                   |
| HQ445759 | uncultured bacterium | deep saprolite and saprock                |
| HQ445780 | uncultured bacterium | deep saprolite and saprock                |
| HQ597234 | uncultured bacterium | grassland soil                            |
| HQ645194 | uncultured bacterium | soil from Tibet Plateau                   |
| HQ674368 | uncultured bacterium | subarctic Pacific Ocean                   |
| JF344017 | uncultured bacterium | hydrocarbon polluted marine sediments     |
| JF747659 | uncultured bacterium | hypersaline groundwater                   |
| JF833915 | uncultured bacterium | potassium mine soil                       |
| JN023646 | uncultured bacterium | temperate highland grassland              |
| JN038695 | uncultured bacterium | Chongxi wetland soil                      |
| JN038949 | uncultured bacterium | Chongxi wetland soil                      |
| JN038970 | uncultured bacterium | Chongxi wetland soil                      |
| JN178091 | uncultured bacterium | Texcoco lake extreme saline-alkaline soil |

|          |                      |                                             |
|----------|----------------------|---------------------------------------------|
| JN178438 | uncultured bacterium | Texcoco lake extreme saline-alkaline soil   |
| JN254798 | uncultured bacterium | rhizospheric sludge                         |
| JN494156 | uncultured bacterium | Guerrero Negro Hypersaline Mat              |
| JN559123 | uncultured bacterium | soil                                        |
| JN672277 | uncultured bacterium | microbial mat from lava tube wall           |
| JN869187 | uncultured bacterium | lake water                                  |
| JN886858 | uncultured bacterium | South West Indian Ridge carbonate sediments |
| JN977149 | uncultured bacterium | Jiaozhao Bay sediment                       |
| JN977211 | uncultured bacterium | Jiaozhao Bay sediment                       |
| JN977256 | uncultured bacterium | Jiaozhao Bay sediment                       |
| JN995378 | uncultured bacterium | anaerobic bioreactor fed with butyrate      |
| JQ612184 | uncultured bacterium | N/A                                         |
| JQ612214 | uncultured bacterium | N/A                                         |
| JQ711709 | uncultured bacterium | pothole sediments on arenitic sandstone     |
| JQ825020 | uncultured bacterium | saline-alkali soil                          |
| JQ941812 | uncultured bacterium | diseased leaf                               |
| JX016641 | uncultured bacterium | marine bulk water                           |
| JX133327 | uncultured bacterium | diseased soil                               |
| JX193422 | uncultured bacterium | intertidal surface sediment                 |
| JX206587 | uncultured bacterium | marine sponge                               |
| JX221863 | uncultured bacterium | subsurface aquifer sediment                 |
| JX222022 | uncultured bacterium | subsurface aquifer sediment                 |
| JX222027 | uncultured bacterium | subsurface aquifer sediment                 |
| JX222875 | uncultured bacterium | subsurface aquifer sediment                 |
| JX227478 | uncultured bacterium | Clarion-Clipperton Fracture Zone sediment   |
| JX227517 | uncultured bacterium | Clarion-Clipperton Fracture Zone sediment   |
| JX391806 | uncultured bacterium | marine sediment                             |
| JX504408 | uncultured bacterium | oolitic sand                                |
| JX504455 | uncultured bacterium | oolitic sand                                |
| KC255253 | uncultured bacterium | calcium carbonate                           |
| KC331544 | uncultured bacterium | apple orchard                               |
| KF037620 | uncultured bacterium | soil                                        |
| KF741569 | uncultured bacterium | Talbert salt marsh sediment                 |
| KJ191789 | uncultured bacterium | Pinus massoniana soil                       |
| KJ461654 | uncultured bacterium | littoral wetland of a boreal lake           |
| KJ590596 | uncultured bacterium | membrane coupon in bioreactors              |
| KM071728 | uncultured bacterium | deep-sea hydrothermal vent sediments        |

|                 |                                     |                                       |
|-----------------|-------------------------------------|---------------------------------------|
| KM221425        | uncultured bacterium                | hot spring                            |
| KP784749        | uncultured bacterium                | hot spring                            |
| KT361125        | uncultured bacterium                | gold mine                             |
| HM038000        | <i>Vampirovibrio chlorellavorus</i> | N/A                                   |
| AY049713        | <i>Victivallis vadensis</i>         | N/A                                   |
| GCA_002923315.1 | GAL08 MAG                           | mat from ammonia-oxidizing enrichment |
| 3300014464      | GAL08 Species 3 SAG                 | Dewar Creek                           |
| 3300020139_8    | GAL08 MAG                           | Great Boiling Springs sediment        |
| 3300005858_6    | GAL08 MAG                           | Yellowstone freshwater sample         |
| 2706794759      | GAL08 Species 2 SAG                 | Dewar Creek                           |
| 3300013894      | GAL08 Species 1 SAG                 | Dewar Creek                           |

**Supplementary Table S2** Substrates included in a carbohydrate mixture that failed to produce an enrichment of GAL08<sup>a</sup>.

| <b>Substrate<sup>b</sup></b> | <b>Sterilization Method</b> | <b>Rationale (predicted function in SAG/MAG analyses)</b> |
|------------------------------|-----------------------------|-----------------------------------------------------------|
| xylose                       | filtration                  | pentose transporter                                       |
| arabinose                    | filtration                  | pentose transporter                                       |
| sucrose                      | filtration                  | alpha glucosidase                                         |
| maltose                      | filtration                  | alpha glucosidase                                         |
| mannose                      | filtration                  | phosphotransferase system                                 |
| locust bean gum              | autoclaved                  | glycosyl hydrolases                                       |
| mannan                       | filtration                  | glycosyl hydrolases                                       |
| xylan                        | filtration                  | glycosyl hydrolases                                       |
| dextran                      | filtration                  | glycosyl hydrolases                                       |
| chitosan                     | autoclave                   | gluconase                                                 |
| chitin                       | autoclave                   | gluconase                                                 |
| N-acetyl glucosamine         | filtration                  | gluconase                                                 |
| carboxymethyl cellulose      | autoclave                   | gluconase                                                 |

<sup>a</sup> Substrates were tested in two enrichment experiments, each set up in triplicate.

<sup>b</sup> All substrates were mixed at a final concentration of 0.1 g/L total substrate in the enrichment vials; carbohydrates were added in equal ratios, accounting for carbon number of substrates.

**Supplementary Table S3.** Relative abundance of detected Illumina 16S rRNA gene reads classified as either GAL08, *Deinococcus-Thermus*, or *Rhodothermus* when incubated at 65°C for one week with various substrates under normal atmospheric conditions. Relative abundance data was calculated from OTU tables produced by running QIIME pipeline version 1.9.1 (Caporaso et al., 2010); sequencing depth, represented by the total number of reads detected, is also indicated. Regardless of substrate used, incubation with atmospheric levels of oxygen resulted in a dramatic reduction in GAL08 16S rRNA relative abundance, while aerobic clades such as *Deinococcus-Thermus* and *Rhodothermus* increased in relative abundance. qPCR analysis of DChs\_GAL08 16S rRNA gene reads for this experiment is shown in Supplementary Figure S8.

| Sample                           | Oxygen      | Temp. (°C) | GAL08  | <i>Deinococcus -Thermus</i> | <i>Rhodothermus</i> | Total reads |
|----------------------------------|-------------|------------|--------|-----------------------------|---------------------|-------------|
| Unincubated control <sup>a</sup> | Native      | 4          | 20.5 % | 7.2 %                       | 9.0 %               | 6018        |
| Sodium benzoate                  | Atmospheric | 65         | 0.0 %  | 59.4 %                      | 13.3 %              | 2404        |
| Cellobiose                       | Atmospheric | 65         | 0.1 %  | 73.2 %                      | 14.6 %              | 907         |
| Trehalose dehydrogenase          | Atmospheric | 65         | 0.1 %  | 42.5 %                      | 43.5 %              | 805         |
| No substrate control             | Atmospheric | 65         | 0.1 %  | 78.3 %                      | 6.8 %               | 2413        |

<sup>a</sup>The original sediment sampled from the Dewar Creek hot spring, stored at 4°C, that was used as inoculum for incubations at 65°C with the carbon sources shown.

**Supplementary Table S4.** Genes discussed in the text and detection in SAGs of each of the 3 species. An X indicates the gene was detected, a dash that it was not. Accession numbers are given, for one SAG only, where possible from the most complete SAG 3300013894. Where multiple genes are present in this SAG, all are listed. EC numbers or pfams were used for searching SAGs, and annotations were manually inspected in the case of enzymes with multiple pfams or multiple components.

| Annotation                                                                         | Sp1 | Sp2     | Sp3    | Representative Locus                                                                       |
|------------------------------------------------------------------------------------|-----|---------|--------|--------------------------------------------------------------------------------------------|
| <b>Structural</b>                                                                  |     |         |        |                                                                                            |
| OmpA family, pfam00691                                                             | X   | X       | X      | Ga0170566_10150, Ga0170566_10268<br>Ga0170566_10586                                        |
| OEP, outer membrane efflux protein (TolC), pfam02321                               | X   | X       | X      | Ga0170566_101117, Ga0170566_101215<br>Ga0170566_10479, Ga0170566_10969,<br>Ga0170566_11536 |
| Lipopolysaccharide export system permease LptF/LptG, pfam03739                     | X   | X       | -      | Ga0170566_10130, Ga0170566_10131                                                           |
| MreB/Mbl protein, pfam06723                                                        | X   | X       | X      | Ga0170566_10844, Ga0170566_12324,<br>Ga0170566_12624                                       |
| rod shape-determining protein MreC, pfam04085                                      | X   | X       | X      | Ga0170566_12323                                                                            |
| rod shape-determining protein MreD, pfam04093                                      | X   | X       | -      | Ga0170566_12322                                                                            |
| rod shape determining protein RodA, pfam01098                                      | X   | X       | X      | Ga0170566_12320                                                                            |
| <b>Anaerobic respiration</b>                                                       |     |         |        |                                                                                            |
| nitrate reductase alpha subunit, NarG, pfam 000384                                 | X   | X       | X      | Ga0170566_11174                                                                            |
| nitrate reductase beta subunit, NarH, pfam13247                                    | X   | X       | X      | Ga0170566_11172                                                                            |
| DMSO reductase family type II enzyme chaperone pfam02613                           | X   | X       | X      | Ga0070090_14744                                                                            |
| DMSO reductase family type II enzyme, heme b subunit pfam09459                     | X   | X       | X      | Ga0070090_14743                                                                            |
| nitric oxide reductase subunit B, NorB, pfam00115                                  | X   | X       | X      | Ga0170566_11855                                                                            |
| nitric oxide reductase NorQ protein, pfam07728, pfam08406                          | X   | X       | X      | Ga0170566_12334                                                                            |
| nitric oxide reductase activation protein, pfam 00092                              | X   | X       | X      | Ga0170566_12333                                                                            |
| NnrS protein/protein of unknown function, pfam04950                                | X   | X       | X      | Ga0170566_11853                                                                            |
| nitrous oxide reductase apoprotein, NosZ, pfam13473                                | X   | X       | X      | Ga0070318_10983                                                                            |
| nitrous oxidase accessory protein, NosD, pfam05048                                 | X   | X       | X      | Ga0170566_10846                                                                            |
| decaheme c-type cytochrome, OmcA/MtrC family, pfam09699                            | X   | X       | X      | Ga0170566_13014                                                                            |
| <b>Key ferredoxin-using enzymes</b>                                                |     |         |        |                                                                                            |
| Pfr, pyruvate ferredoxin/ flavodoxin oxidoreductase, EC:1.2.7.1                    | X   | X       | X      | Ga0170566_11217                                                                            |
| 2-oxoglutarate ferredoxin oxidoreductase subunit alpha, EC:1.2.7.3; EC:1.2.7.11    | X   | X       | X      | Ga0170566_102246, Ga0170566_1019,<br>Ga0170566_10476                                       |
| 2-oxoglutarate ferredoxin oxidoreductase subunit beta, EC:1.2.7.3, EC:1.2.7.11     | X   | X       | X      | Ga0170566_102245, Ga0170566_1018,<br>Ga0170566_10475                                       |
| 2-oxoglutarate ferredoxin oxidoreductase subunit delta EC:1.2.7.3; pfam12838       | X   | X       | X      | Ga0170566_10110                                                                            |
| 2-oxoglutarate ferredoxin oxidoreductase subunit gamma, EC:1.2.7.3; pfam01558      | X   | X       | X      | Ga0170566_1017                                                                             |
| <b>Fermentation</b>                                                                |     |         |        |                                                                                            |
| acetyl CoA synthetase, Acs1, EC:6.2.1.1                                            | X   | X       | X      | Ga0170566_12628                                                                            |
| FNR, ferredoxin:NADP+ oxidoreductase, EC:1.18.1.2                                  | X   | X       | X      | Ga0170566_10248                                                                            |
| phosphate acetyltransferase, EC:2.3.1.8                                            | X   | X       | X      | Ga0170566_10393                                                                            |
| acylphosphatase, EC:3.6.1.7                                                        | X   | X       | X      | Ga0170566_10486                                                                            |
| acetaldehyde dehydrogenase, EC 1.2.1.10                                            | -   | X (1/4) | X(3/4) | Ga0170557_10885                                                                            |
| NAD(P)-dependent dehydrogenase, short-chain alcohol dehydrogenase family pfam13561 | X   | X       | X      | Ga0170566_101268, Ga0170566_11227                                                          |



|                                                                                              |         |         |   |                                                                                     |
|----------------------------------------------------------------------------------------------|---------|---------|---|-------------------------------------------------------------------------------------|
| NAD(P)-dependent dehydrogenase, short-chain alcohol dehydrogenase family pfam00106           | X       | X       | X | Ga0170566_10926, Ga0170559_10424                                                    |
| <b>Putative Hydrogenase (only present in Species 2)</b>                                      |         |         |   |                                                                                     |
| NiFe hydrogenase small subunit (HydA, VhoG) pfam01058 EC:1.12.99                             | -       | X (3/4) | - | Ga0070308_101430                                                                    |
| NiFe hydrogenase large subunit (HydB, VhoA) pfam00374 EC:1.12.99                             | -       | X (3/4) | - | Ga0070308_101431                                                                    |
| cytochrome c554 and c-prime (pfam13435, pfam14537)                                           | -       | X (3/4) | - | Ga0070308_101429                                                                    |
| NiFe hydrogenase iron-sulfur subunit D pfam02662 EC:1.12.99                                  | -       | X (4/4) | - | Ga0070308_101426                                                                    |
| heterodisulfide reductase subunit A EC:1.8.98.1                                              | -       | X (4/4) | - | Ga0070308_101425                                                                    |
| hydrogenase maturation protease pfam01750                                                    | -       | X (3/4) | - | Ga0070308_101432                                                                    |
| hydrogenase Ni incorporation protein HypA/HybF pfam01155                                     | -       | X (4/4) | X | Ga0070308_101433                                                                    |
| hydrogenase nickel incorporation protein HypB pfam02492                                      | -       | X (2/4) | - | Ga0070308_101434                                                                    |
| hydrogenase maturation protein HypF (pfam00708, pfam01300, pfam07503)                        | -       | X (3/4) | - | Ga0070308_101435                                                                    |
| hydrogenase maturation protein HypC pfam01455                                                | -       | X (3/4) | - | Ga0070308_101437                                                                    |
| hydrogenase maturation protein HypD pfam01924                                                | -       | X (3/4) | - | Ga0070308_101438                                                                    |
| hydrogenase maturation protein, carbamoyl dehydratase HypE (pfam00586, pfam02769)            | -       | X (2/4) | - | Ga0070308_101439                                                                    |
| NADP-reducing hydrogenase subunit HndB EC:1.12.1.3                                           | -       | X (4/4) | - | Ga0070308_101418                                                                    |
| NAD(P)-dependent iron-only hydrogenase diaphorase component flavoprotein HndC, EC:1.12.1.3   | -       | X (4/4) | - | Ga0070308_101419                                                                    |
| <b>O<sub>2</sub> tolerance</b>                                                               |         |         |   |                                                                                     |
| Cytochrome c peroxidase, EC:1.11.1.5                                                         | X       | X       | X | Ga0170566_102126, Ga0170566_12050                                                   |
| thiol peroxidase, atypical 2-Cys peroxiredoxin EC:1.11.1.15                                  | X       | X       | X | Ga0170566_11020                                                                     |
| alkylhydroperoxidase/carboxymuconolactone decarboxylase family protein YurZ pfam02627        | X       | X       | X | Ga0170566_11058, Ga0170566_12126                                                    |
| molecular chaperone Hsp33, pfam01430                                                         | X       | X       | X | Ga0170566_1282                                                                      |
| Hemerythrin HHE cation binding domain-containing protein pfam01814                           | X       | X       | X | Ga0170566_10111                                                                     |
| Hemerythrin-like domain-containing protein pfam01814                                         | X       | X       | X | Ga0170566_101178, Ga0170566_1082, Ga0170566_11175, Ga0170566_11851, Ga0170566_11852 |
| <b>Carbohydrate transport and metabolism</b>                                                 |         |         |   |                                                                                     |
| formate dehydrogenase iron-sulfur subunit pfam13247                                          | X       | X       | X | Ga0170566_10595                                                                     |
| Cytochrome b subunit of formate dehydrogenase pfam01292                                      | X       | X       | X | Ga0170566_1306                                                                      |
| Formate dehydrogenase assembly factor FdhD, pfam02634                                        | X       | -       | X | Ga0170566_102152                                                                    |
| Alpha-glucosidase (GH31), EC:3.2.1.20                                                        | X       | X       | X | Ga0170566_10965                                                                     |
| Beta-glucosidase, EC:3.2.1.21 ( <b>Species 1 only</b> )                                      | X (4/7) | -       | - | Ga0170566_10965                                                                     |
| Family 4 glycosyl hydrolase, pfam02056                                                       | X       | X       | X | Ga0170566_102191                                                                    |
| Glycosyl hydrolase family 53, pfam07745 ( <b>Species 2 only</b> )                            | -       | X (3/4) | - | Ga0070308_100537                                                                    |
| Glycosyl hydrolase family 57, pfam03065                                                      | X       | X       | X | Ga0170566_10868                                                                     |
| O-Glycosyl hydrolase (GH30, GH39), pfam01229, pfam02055, pfam17189 ( <b>Species 2 only</b> ) | -       | X (4/4) | - | Ga0070308_1001142                                                                   |
| predicted GH43/DUF377 family glycosyl hydrolase pfam04041                                    | X       | X       | X | Ga0170566_11470, Ga0170566_11471                                                    |
| ribose transport system ATP-binding protein, EC:3.6.3.17                                     | X       | X       | X | Ga0170566_102200                                                                    |
| ribose transport system substrate-binding protein, pfam13407                                 | X       | X       | X | Ga0170566_102203                                                                    |

|                                                                                                                                              |   |   |         |                                                                                             |
|----------------------------------------------------------------------------------------------------------------------------------------------|---|---|---------|---------------------------------------------------------------------------------------------|
| ribose transport system permease protein, pfam02653                                                                                          | X | X | X       | Ga0170566_102201                                                                            |
| phosphoenolpyruvate carboxylase, type 1, EC:4.1.1.31<br><b>(Species 3 only)</b>                                                              | - | - | X (3/5) | Ga0070318_100325                                                                            |
| phosphoenolpyruvate carboxykinase (GTP)<br>pfam00821                                                                                         | X | X | X       | Ga0170566_10635                                                                             |
| fructose 1,6-bisphosphate aldolase/phosphatase<br>EC:4.1.2.13 pfam01950                                                                      | X | X | X       | Ga0170566_10386                                                                             |
| oligopeptide transport system substrate-binding protein<br>OppA pfam00496                                                                    | X | X | X       | Ga0170566_10237                                                                             |
| oligopeptide transport system permease protein OppC<br>OppD, pfam00528                                                                       | X | X | X       | Ga0170566_10236, Ga0170566_10235                                                            |
| peptide/nickel transport system ATP-binding<br>protein/oligopeptide transport system ATP-binding<br>protein OppD OppF pfam00005 pfam08352    | X | X | X       | Ga0170566_1152, Ga0170566_1153                                                              |
| phosphotransferase system, PTS-HPr, pfam00381                                                                                                | X | X | X       | Ga0170566_105100                                                                            |
| phosphotransferase system, enzyme I, PtsI EC:2.7.3.9                                                                                         | X | X | X       | Ga0170566_10599                                                                             |
| PTS system, mannose-specific IIA component<br>EC:2.7.1.69                                                                                    | X | X | X       | Ga0170566_105101                                                                            |
| Major facilitator transporter MFS1, pfam07690                                                                                                | X | X | X       | Ga0170566_102230, Ga0170566_102230,<br>Ga0170566_11624, Ga0170566_1274                      |
| <b>Attachment</b>                                                                                                                            |   |   |         |                                                                                             |
| Uncharacterized protein involved in exopolysaccharide<br>biosynthesis pfam13614 pfam13807 pfam02706                                          | X | X | X       | Ga0170566_104107                                                                            |
| polysaccharide export outer membrane protein<br>pfam02563 pfam10531                                                                          | X | X | X       | Ga0170566_104108                                                                            |
| Type II secretory pathway, pseudopilin PulG;<br>pfam07963                                                                                    | X | X | X       | Ga0170566_10264, Ga0170566_10779                                                            |
| Prepilin signal peptidase PulO (type II secretory<br>pathway) pfam06750 pfam01478                                                            | X | X | X       | Ga0170566_10349                                                                             |
| Type II secretion system protein G (GspG) pfam08334                                                                                          | X | X | X       | Ga0170566_10649                                                                             |
| Type II secretory pathway component GspD/PulD<br>(secretin) pfam00263                                                                        | X | X | X       | Ga0170559_104116                                                                            |
| Type II secretion system (T2SS), protein M subtype b<br>pfam10741                                                                            | X | X | X       | Ga0256648_101311                                                                            |
| <b>Siderophore transport</b>                                                                                                                 |   |   |         |                                                                                             |
| TonB C terminal, pfam13103, pfam03554                                                                                                        | X | X | X       | Ga0170566_10152, Ga0170566_106119                                                           |
| biopolymer transport protein TolQ/ExbB, pfam01618                                                                                            | X | X | X       | Ga0170566_10154, Ga0170566_10620,<br>Ga0170566_106118                                       |
| biopolymer transport protein TolR/ExbD, pfam02472                                                                                            | X | X | X       | Ga0170566_10153, Ga0170566_10621,<br>Ga0170566_10622, Ga0170566_106116,<br>Ga0170566_106117 |
| iron complex outer membrane receptor protein/vitamin<br>B12 transporter/ potential PirA-family-siderophore-<br>receptor, pfam13620 pfam07715 | X | X | X       | Ga0170566_1213                                                                              |
| iron complex transport system ATP-binding protein,<br>EC:3.6.3.4                                                                             | X | X | X       | Ga0170566_1212                                                                              |
| iron complex transport system permease protein,<br>pfam01032                                                                                 | X | X | X       | Ga0170566_1211                                                                              |
| <b>Biotin (Species 1 only)</b>                                                                                                               |   |   |         |                                                                                             |
| biotin transport system substrate-specific component<br>(BioY))                                                                              | X | - | -       | Ga0170566_11190                                                                             |

**Supplementary Table S5.** Top BLASTP hits to the RefSeq protein database for the putative hydrogenase-encoding genes identified in Table S4.

| Putative Hydrogenase (only present in Species 2)                                              | Locus Tag        | Top Blast hit (reference proteins only)                                   |
|-----------------------------------------------------------------------------------------------|------------------|---------------------------------------------------------------------------|
| NiFe hydrogenase small subunit (HydA, VhoG)<br>pfam01058 EC:1.12.99                           | Ga0070308_101430 | 76% <i>Candidatus</i> Sulfopaludibacter sp. ( <i>Acidobacteria</i> ) SbA4 |
| NiFe hydrogenase large subunit (HydB, VhoA)<br>pfam00374 EC:1.12.99                           | Ga0070308_101431 | 74% <i>Dehalogenimonas lykanthroporepellens</i> ( <i>Chloroflexi</i> )    |
| cytochrome c554 and c-prime (pfam13435, pfam14537)                                            | Ga0070308_101429 | 47% <i>Kosmotoga pacifica</i> ( <i>Thermotogales</i> )                    |
| NiFe hydrogenase iron-sulfur subunit D<br>pfam02662 EC:1.12.99                                | Ga0070308_101426 | 74% <i>Dehalogenimonas lykanthroporepellens</i> ( <i>Chloroflexi</i> )    |
| heterodisulfide reductase subunit A EC:1.8.98.1                                               | Ga0070308_101425 | 62% <i>Candidatus</i> Sulfopaludibacter sp. SbA4 ( <i>Acidobacteria</i> ) |
| hydrogenase maturation protease pfam01750                                                     | Ga0070308_101432 | 56% <i>Candidatus</i> Sulfopaludibacter sp. SbA4 ( <i>Acidobacteria</i> ) |
| hydrogenase Ni incorporation protein HypA/HybF<br>pfam01155                                   | Ga0070308_101433 | 49% <i>Pectinatus cerevisiiphilus</i> ( <i>Firmicutes</i> )               |
| hydrogenase nickel incorporation protein HypB<br>pfam02492                                    | Ga0070308_101434 | 56% <i>Desulfatiglans anilini</i> ( <i>Deltaproteobacteria</i> )          |
| hydrogenase maturation protein HypF (pfam00708, pfam01300, pfam07503)                         | Ga0070308_101435 | 66% <i>Chroococcidiopsis thermalis</i> ( <i>Cyanobacteria</i> )           |
| hydrogenase maturation protein HypC<br>pfam01455                                              | Ga0070308_101437 | 72% <i>Gloeotheca citriformis</i> ( <i>Cyanobacteria</i> )                |
| hydrogenase maturation protein HypD<br>pfam01924                                              | Ga0070308_101438 | 78% <i>Phormidium ambiguum</i> ( <i>Cyanobacteria</i> )                   |
| hydrogenase maturation protein, carbamoyl dehydratase HypE (pfam00586, pfam02769)             | Ga0070308_101439 | 75% <i>Phormidium ambiguum</i> ( <i>Cyanobacteria</i> )                   |
| NADP-reducing hydrogenase subunit HndB<br>EC:1.12.1.3                                         | Ga0070308_101418 | 50% <i>Desulfomonile tiedjei</i> ( <i>Deltaproteobacteria</i> )           |
| NAD(P)-dependent iron-only hydrogenase diaphorase component flavoprotein HndC,<br>EC:1.12.1.3 | Ga0070308_101419 | 62% <i>Mesoaciditoga lauensis</i> ( <i>Thermotogales</i> )                |

**Supplementary Table S6.** A list of potential auxotrophies (as indicated by “not detected”) in all three species of GAL08 at Dewar Creek.

| <b>Amino Acid</b> | <b>Prototrophic?</b> |
|-------------------|----------------------|
| arginine          | not detected         |
| asparagine        | not detected         |
| aspartic acid     | not detected         |
| leucine           | not detected         |
| lysine            | not detected         |
| phenylalanine     | not detected         |
| serine            | not detected         |
| threonine         | not detected         |
| tryptophan        | not detected         |
| tyrosine          | not detected         |
| alanine           | yes                  |
| glutamic acid     | yes                  |
| histidine         | yes                  |
| isoleucine        | yes                  |
| proline           | yes                  |
| valine            | yes                  |
| cysteine          | yes                  |
| glutamine         | yes                  |
| methionine        | yes                  |
| glycine           | yes                  |
| selenocysteine    | yes                  |

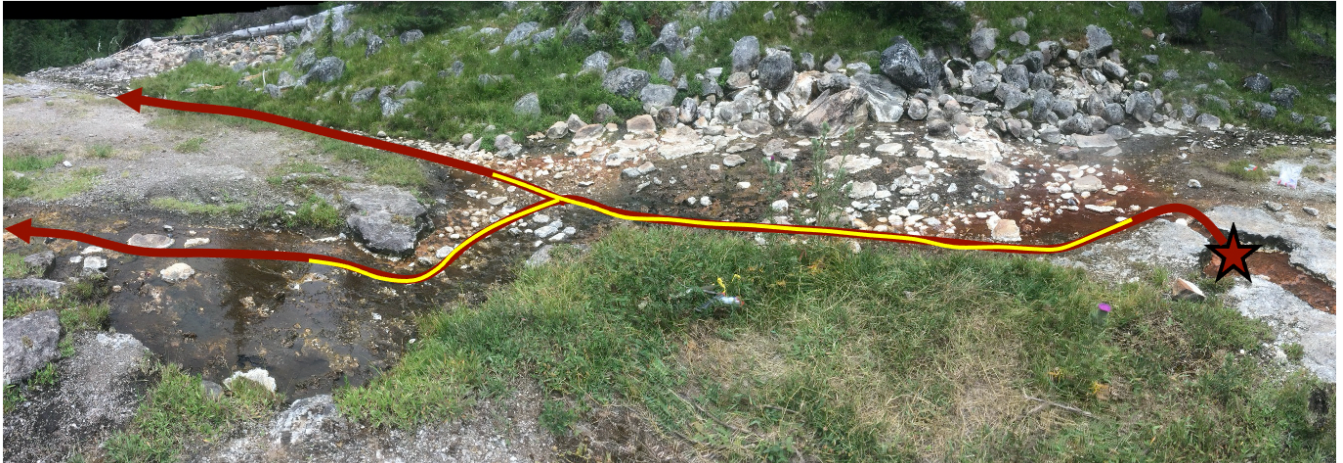

### Supplementary Figure S1

Photograph of the Dewar Creek hot spring, British Columbia, as seen in July 2017. One of the outflow channel paths of the stream, which splits downstream, is marked by a red line. The source of the stream is marked by a star and the direction of the flow is indicated by arrowheads. The temperature at the source is typically around 79.8 °C; temperature gradually decreases along the flow path until ambient temperature is reached downstream, over a distance of approximately 6 meters. Areas of the outflow path in which pockets of 65°C soil can be located, and which were sampled for soils used in GAL08 cultivation experiments, are marked in yellow.

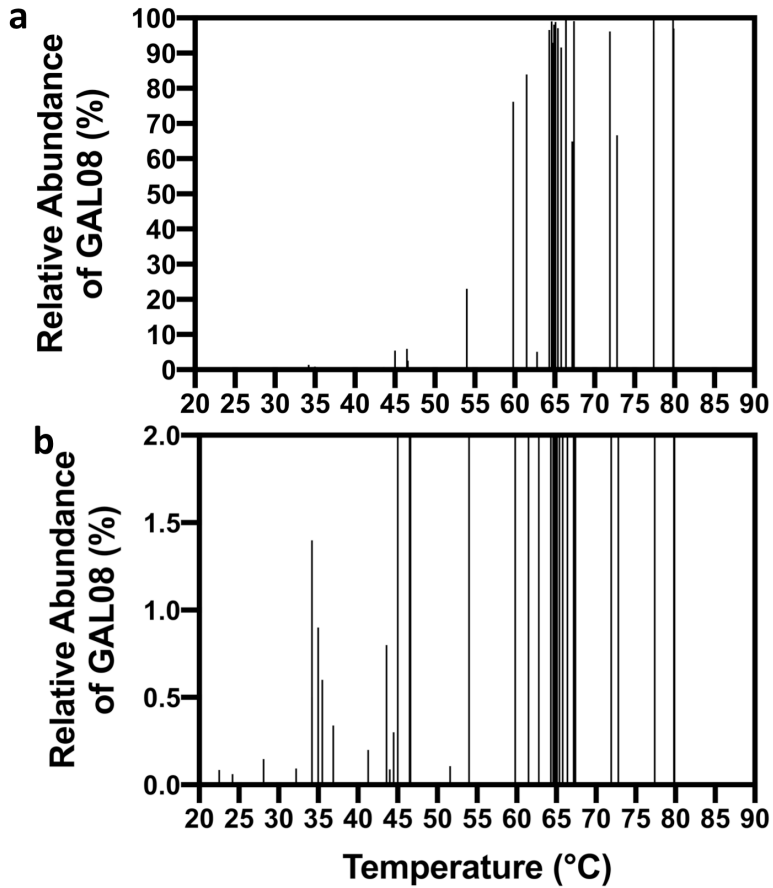

**Supplementary Figure S2**

Relative abundance of GAL08 relative to all *Acidobacteria* based on 16S rRNA gene amplicon sequencing of 60 bacterial communities in sediments collected from 22.5 to 85.9 °C. GAL08 reads were detected in 43 out of 60 samples. Panel (B) shows the same data as panel (A), but the y-axis is reduced to better visualize low-abundance samples.

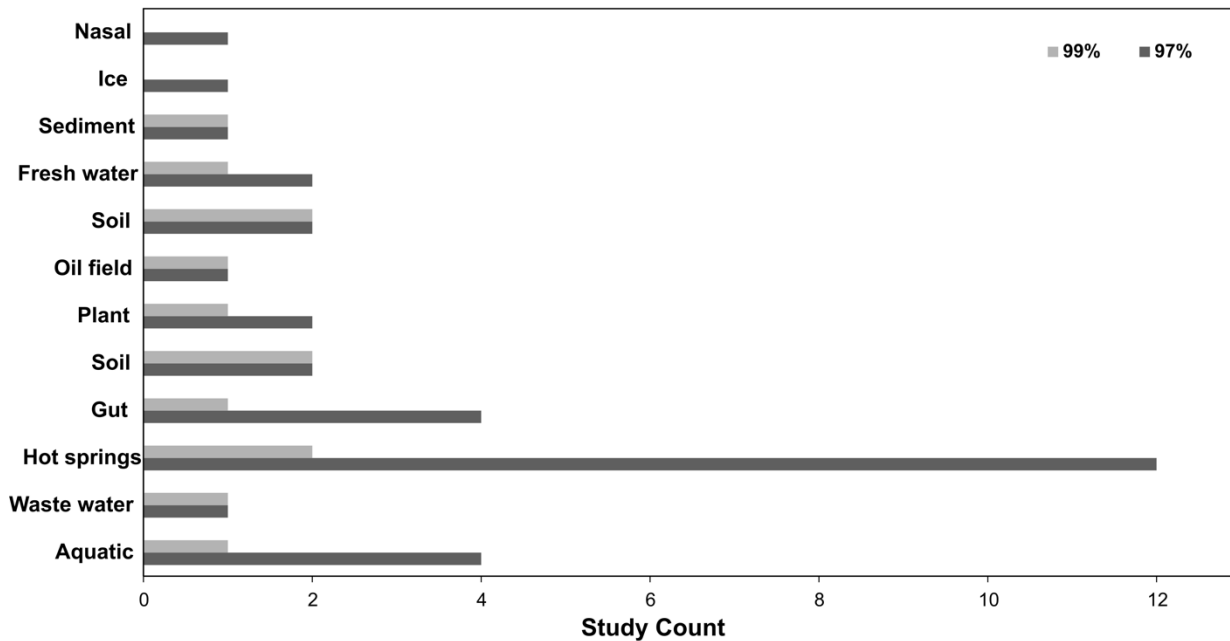

### Supplementary Figure S3

Sample sites in the SRA database in which 16S rRNA gene sequences that are 97% (dark gray bars) or 99% (light gray bars) similar to DChs\_GAL08 (Species 1) were detected. Data are based on a search in August 2021 using IMNGS (Lagkouvelos et al., 2016).

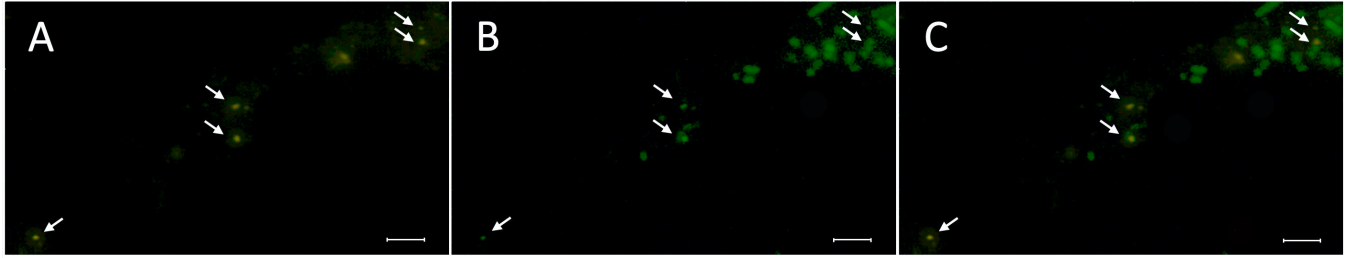

**Supplementary Figure S4**

Fluorescence in situ hybridization images of cells identified as GAL08 (indicated by arrows) detected by a probe mixture of GAL-08\_185, cy3-labelled, yellow (**A**), EUB338, Alexa-labelled, green (**B**) in samples from Hoodoo Creek at 61 °C. A merged image of panels A and B is presented in panel (**C**). The scale bar represents 5  $\mu$ m.



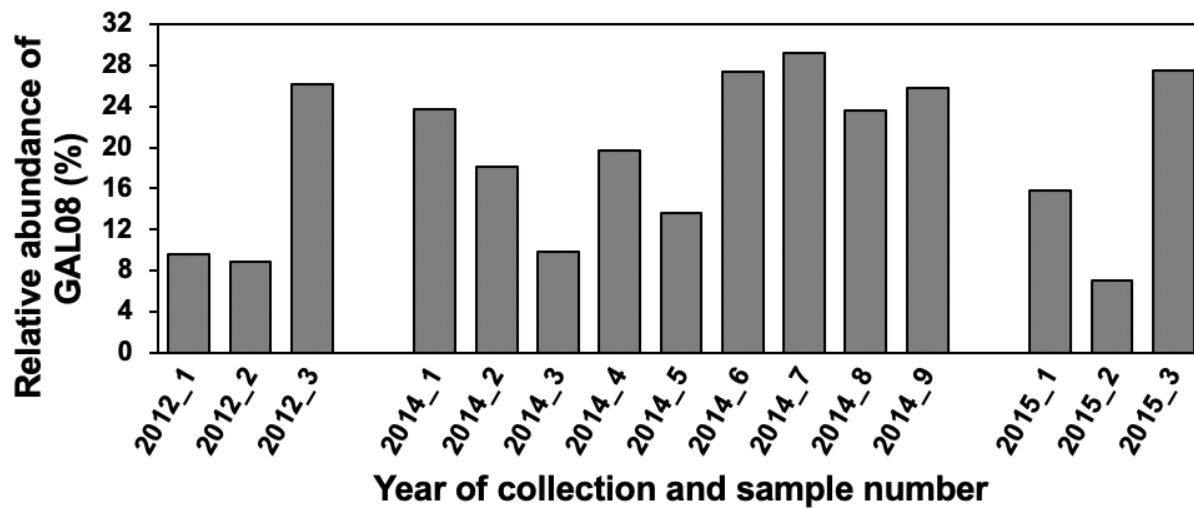

**Supplementary Figure S5**

Abundance of GAL08 relative to all other *Bacteria* detected at the Dewar Creek hot spring in samples collected between 64.3 and 67.4°C over three years, based on 16S rRNA gene amplicon sequencing.

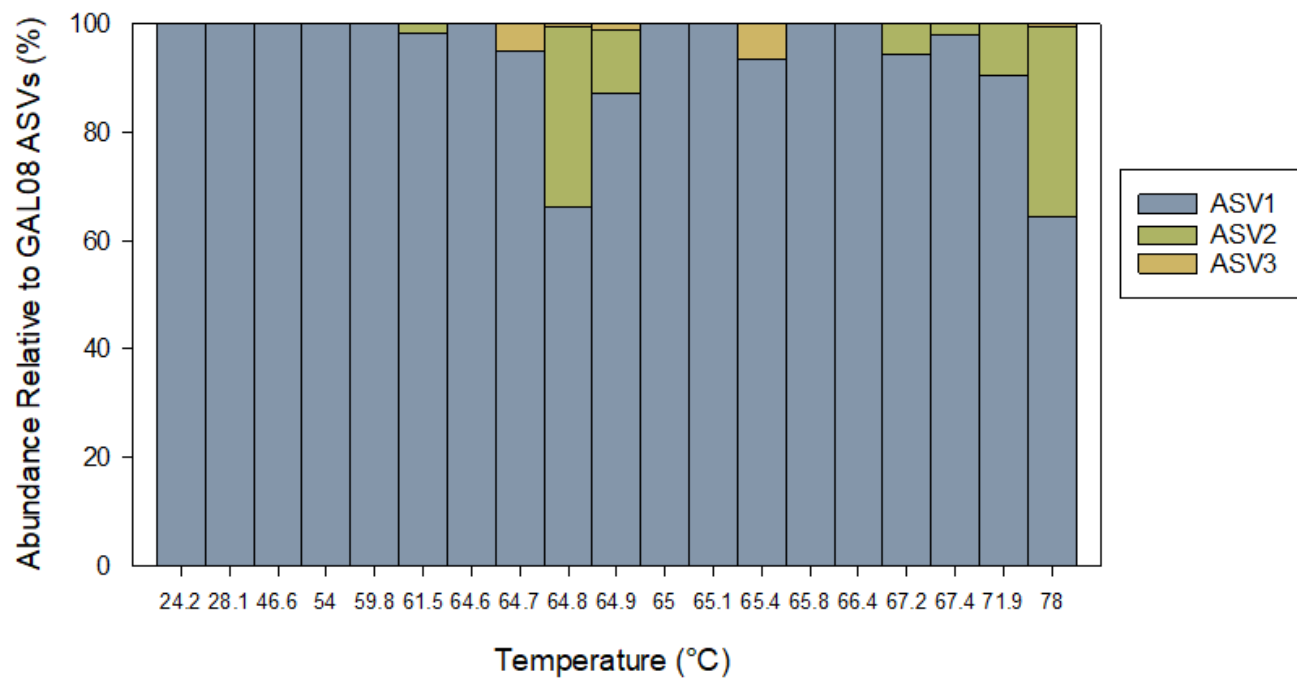

**Supplementary Figure S6**

Predominance of the three ASVs belonging to DChs\_GAL08 at temperatures ranging from 24.1 to 78.0°C, expressed as a percentage of the entire group. ASV1=Species1, ASV2=Species2, and ASV3=Species3 (Table 1).

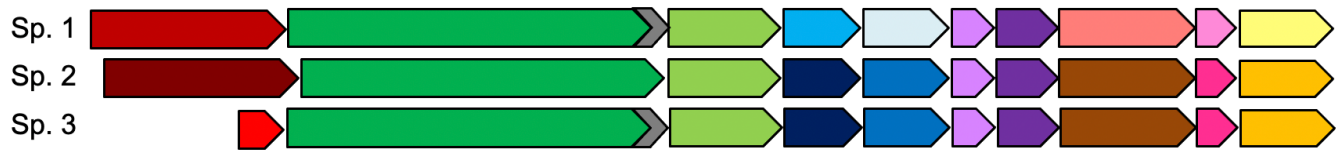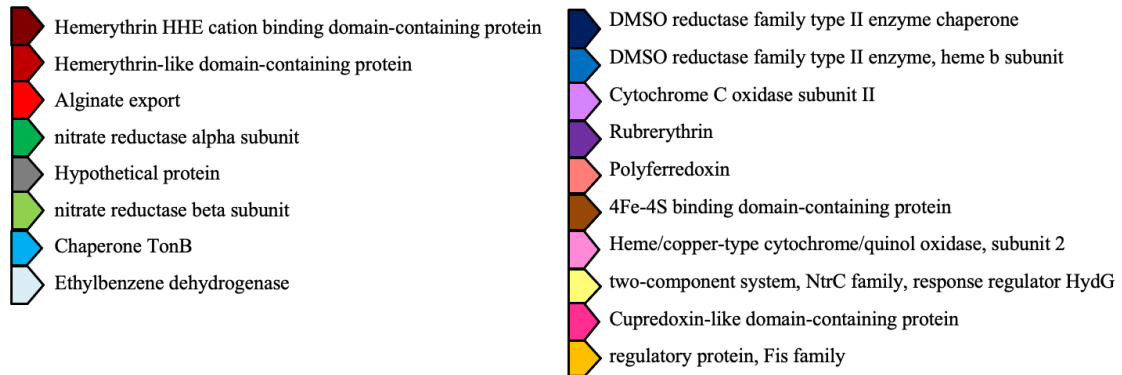

### Supplementary Figure S7

Genetic environment of hemerythrin-like proteins detected in the most complete DChs\_GAL08 SAGs of each species. SAGs were annotated using the JGI's IMG platform.

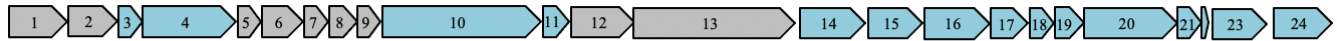

|    |                                                                               |
|----|-------------------------------------------------------------------------------|
| 1  | putative adenylylsulfate reductase-associated electron transfer protein QmoC  |
| 2  | NADH:ubiquinone oxidoreductase subunit (chain E)                              |
| 3  | NADP-reducing hydrogenase subunit HndB                                        |
| 4  | NAD(P)-dependent iron-only hydrogenase diaphorase component flavoprotein HndC |
| 5  | hypothetical protein                                                          |
| 6  | CBS domain-containing protein                                                 |
| 7  | DRTGG domain-containing protein                                               |
| 8  | hypothetical protein                                                          |
| 9  | Histidine kinase-, DNA gyrase B-, and HSP90-like ATPase                       |
| 10 | heterodisulfide reductase subunit A                                           |
| 11 | F420-non-reducing hydrogenase iron-sulfur subunit D                           |
| 12 | phenylacetyl-CoA:acceptor oxidoreductase PadC subunit                         |
| 13 | Anaerobic selenocysteine-containing dehydrogenase                             |
| 14 | cytochrome c554 and c-prime                                                   |
| 15 | F420-non-reducing hydrogenase small subunit VhoG                              |
| 16 | F420-non-reducing hydrogenase large subunit VhoA                              |
| 17 | hydrogenase maturation protease                                               |
| 18 | hydrogenase Ni incorporation protein HypA/HybF                                |
| 19 | hydrogenase nickel incorporation protein HypB                                 |
| 20 | hydrogenase maturation protein HypF                                           |
| 21 | hydrogenase maturation protein HypC                                           |
| 22 | hydrogenase maturation protein HypD                                           |
| 23 | hydrogenase maturation protein                                                |

### Supplementary Figure S8

Hydrogenase island in Species 2. Genes annotated as hydrogenases are colored blue, other genes are shown in gray.

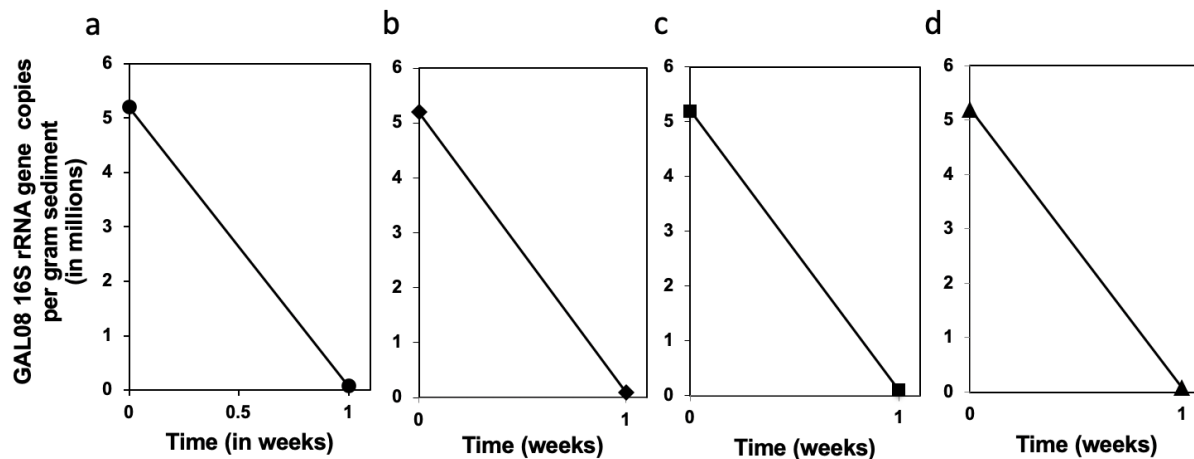

**Supplementary Figure S9**

GAL08 16S rRNA gene copies, in millions, per gram of sediment incubated under atmospheric conditions. The enrichment cultures used sediment and source water from the Dewar Creek hot spring, incubated at 65°C. Data shown represent unamended sediment (**A**), and sediment amended with (**B**) sodium benzoate, (**C**) trehalose, or (**D**) cellobiose.

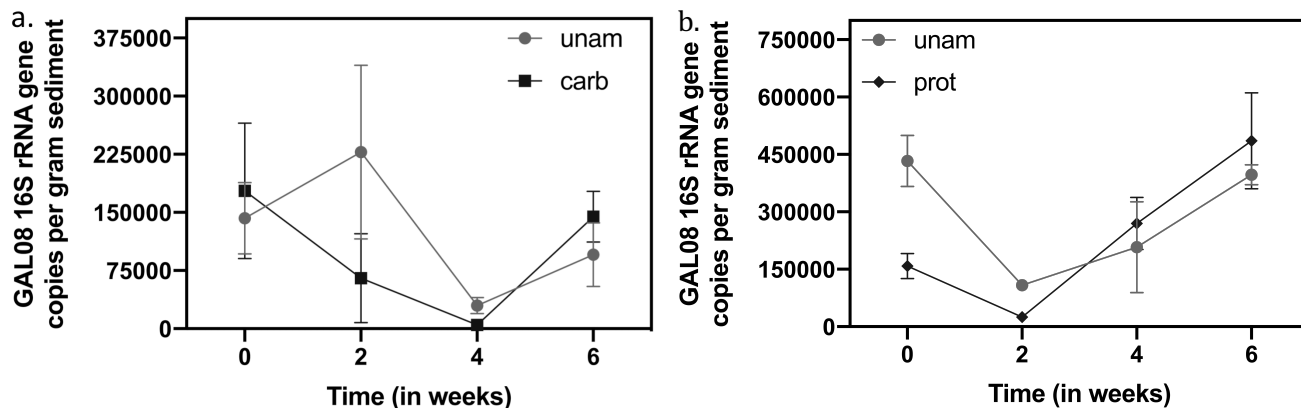

### Supplementary Figure S10

GAL08 16S rRNA gene copies per gram of sediment incubated under a 5 % carbon dioxide, and 1 % oxygen atmosphere, with the remainder being nitrogen gas. All cultures used sediment and source water from the Dewar Creek both spring, incubated at 65°C, and amended with either (A) a carbohydrate mix (see Table S2), or (B) a protein mix (protease peptone, protein hydrolysate amicase, and yeast extract, at a final concentration of 0.1 g/L each, or 0.3 g/L total in the enrichment vials). Inoculating sediment was tested for the presence of GAL08 via GAL08-specific qPCR primers prior to use in the experiment. Circles, squares, and diamonds represent the mean of three replicates; error bars represent plus/minus SEM.
